# Supplementary material
Source: Elsevier journal article supplement (https://comptes-rendus.academie-sciences.fr/chimie/article/10.1016/j.crci.2010.04.013/file/attach/mmc1.pdf)
Supplement: mmc1 [file mmc1.pdf]

# checkCIF/PLATON report (publication check)

No syntax errors found.  
Please wait while processing ....  
[report](#)

[CIF dictionary](#)  
[Interpreting this](#)

## Datablock: bim140p\_1a

---

Bond precision: C-C = 0.0182 Å Wavelength=0.71073  
 Cell: a=11.290(5) b=13.493(5) c=17.961(5)  
 alpha=69.453(5) beta=75.682(5) gamma=80.616(5)  
 Temperature: 100 K

|                        | Calculated                        | Reported                |
|------------------------|-----------------------------------|-------------------------|
| Volume                 | 2473.7(16)                        | 2473.7(16)              |
| Space group            | P -1                              | P-1                     |
| Hall group             | -P 1                              | -P 1                    |
| Moiety formula         | 2(C50 H44 Cl Np O6 P4), C14 Np O2 | ?                       |
| Sum formula            | C100 H88 Cl6 Np3 O14 P8           | C100 H88 Cl6 Np3 O14 P8 |
| Mr                     | 2685.32                           | 2685.16                 |
| Dx, g cm <sup>-3</sup> | 1.803                             | 1.803                   |
| Z                      | 1                                 | 1                       |
| Mu (mm <sup>-1</sup> ) | 3.481                             | 3.481                   |
| F000                   | 1301.0                            | 1301.0                  |
| F000'                  | 1268.59                           |                         |
| h, k, lmax             | 13, 16, 21                        | 13, 16, 21              |
| Nref                   | 9072                              | 8931                    |
| Tmin, Tmax             | 0.665, 0.933                      | 0.308, 1.000            |
| Tmin'                  | 0.494                             |                         |

Correction method= MULTI-SCAN  
 Data completeness= 0.984 Theta(max)= 25.350  
 R(reflections)= 0.0610( 6172) wR2(reflections)= 0.1489( 8931)  
 S = 1.033 Npar= 592

---

The following ALERTS were generated. Each ALERT has the format  
**[test-name\\_ALERT\\_alert-type\\_alert-level](#)**.  
 Click on the hyperlinks for more details of the test.

### ● Alert level C

[PLAT213 ALERT 2 C](#) Atom C13 has ADP max/min Ratio .....  
 3.40 oblat  
[PLAT213 ALERT 2 C](#) Atom C14 has ADP max/min Ratio .....  
 3.20 oblat

[PLAT213 ALERT 2 C](#) Atom C33 has ADP max/min Ratio .....  
3.60 oblat  
[PLAT250 ALERT 2 C](#) Large U3/U1 Ratio for Average U(i,j) Tensor ....  
2.18  
[PLAT342 ALERT 3 C](#) Low Bond Precision on C-C Bonds (x 1000) Ang ..  
18  
[PLAT048 ALERT 1 C](#) MoietyFormula Not Given .....  
?  
[PLAT153 ALERT 1 C](#) The su's on the Cell Axes are Equal (x 100000)  
500 Ang.  
[PLAT234 ALERT 4 C](#) Large Hirshfeld Difference C29 -- C30 ..  
0.15 Ang.  
[PLAT234 ALERT 4 C](#) Large Hirshfeld Difference C34 -- C35 ..  
0.16 Ang.  
[PLAT234 ALERT 4 C](#) Large Hirshfeld Difference C40 -- C41 ..  
0.16 Ang.

---

### ●Alert level G

[PLAT083 ALERT 2 G](#) SHELXL Second Parameter in WGHT Unusually Large.  
16.79  
[PLAT860 ALERT 3 G](#) Note: Number of Least-Squares Restraints .....  
26  
[PLAT154 ALERT 1 G](#) The su's on the Cell Angles are Equal (x 10000)  
500 Deg.

---

- 0 **ALERT level A** = In general: serious problem
- 0 **ALERT level B** = Potentially serious problem
- 10 **ALERT level C** = Check and explain
- 3 **ALERT level G** = General alerts; check

3 ALERT type 1 CIF construction/syntax error, inconsistent or missing data  
5 ALERT type 2 Indicator that the structure model may be wrong or deficient  
2 ALERT type 3 Indicator that the structure quality may be low  
3 ALERT type 4 Improvement, methodology, query or suggestion  
0 ALERT type 5 Informative message, check

---

## checkCIF publication errors

---

### ●Alert level A

[PUBL006 ALERT 1 A](#) `_publ_requested_journal` is missing  
e.g. 'Acta Crystallographica Section C'  
[PUBL008 ALERT 1 A](#) `_publ_section_title` is missing. Title of paper.  
[PUBL010 ALERT 1 A](#) `_publ_author_address` is missing. Author(s)  
address(es).  
[PUBL012 ALERT 1 A](#) `_publ_section_abstract` is missing.  
Abstract of paper in English.

---

### ●Alert level G

[PUBL013 ALERT 1 G](#) The `_publ_section_comment` (discussion of study) is missing. This is required for a full paper submission (but is optional for an electronic paper).  
[PUBL017 ALERT 1 G](#) The `_publ_section_references` section is missing or

empty.

---

4 **ALERT level A** = Data missing that is essential or data in wrong format

2 **ALERT level G** = General alerts. Data that may be required is missing

# checkCIF/PLATON report (publication check)

No syntax errors found.  
Please wait while processing ....  
[report](#)

[CIF dictionary](#)  
[Interpreting this](#)

## Datablock: cas09mha

---

Bond precision: C-C = 0.0069 Å Wavelength=0.69410  
 Cell: a=16.6871(16) b=14.5034(14) c=17.0076(16)  
 alpha=90 beta=116.056(1) gamma=90  
 Temperature: 100 K

|                        | Calculated                | Reported                |
|------------------------|---------------------------|-------------------------|
| Volume                 | 3697.8(6)                 | 3697.8(6)               |
| Space group            | P 21/n                    | P2(1)/n                 |
| Hall group             | -P 2yn                    | -P 2yn                  |
| Moiety formula         | 2(C18 H17 N P), C14 Np O2 | ?                       |
| Sum formula            | C36 H34 C14 N2 Np O2 P2   | C36 H34 C14 N2 Np O2 P2 |
| Mr                     | 967.44                    | 967.39                  |
| Dx, g cm <sup>-3</sup> | 1.738                     | 1.738                   |
| Z                      | 4                         | 4                       |
| Mu (mm <sup>-1</sup> ) | 0.000                     | 3.220                   |
| F000                   | 1884.0                    | 1884.0                  |
| F000'                  | 1883.70                   |                         |
| h, k, lmax             | 22, 19, 22                | 22, 19, 22              |
| Nref                   | 9231                      | 9201                    |
| Tmin, Tmax             |                           | 0.194, 1.000            |
| Tmin'                  |                           |                         |

Correction method= MULTI-SCAN  
 Data completeness= 0.997 Theta(max)= 27.610  
 R(reflections)= 0.0386( 7916) wR2(reflections)= 0.1005( 9201)  
 S = 1.035 Npar= 436

---

The following ALERTS were generated. Each ALERT has the format  
[test-name\\_ALERT\\_alert-type\\_alert-level](#).  
 Click on the hyperlinks for more details of the test.

---

### ● Alert level C

[PLAT048 ALERT 1 C](#) MoietyFormula Not Given .....  
 ?  
[PLAT480 ALERT 4 C](#) Long H...A H-Bond Reported H1N .. CL2 ..  
 2.89 Ang.

|                                   |      |      |          |       |           |       |
|-----------------------------------|------|------|----------|-------|-----------|-------|
| <a href="#">PLAT731 ALERT 1 C</a> | Bond | Calc | 0.86(4), | Rep   | 0.859(19) | ..... |
| 2.11 su-Ra                        |      |      |          |       |           |       |
|                                   | N1   | -H1N | 1.555    | 1.555 |           |       |
| <a href="#">PLAT731 ALERT 1 C</a> | Bond | Calc | 0.86(4), | Rep   | 0.853(19) | ..... |
| 2.11 su-Ra                        |      |      |          |       |           |       |
|                                   | N1   | -H2N | 1.555    | 1.555 |           |       |
| <a href="#">PLAT731 ALERT 1 C</a> | Bond | Calc | 0.85(4), | Rep   | 0.849(19) | ..... |
| 2.11 su-Ra                        |      |      |          |       |           |       |
|                                   | N2   | -H4N | 1.555    | 1.555 |           |       |
| <a href="#">PLAT735 ALERT 1 C</a> | D-H  | Calc | 0.86(4), | Rep   | 0.859(19) | ..... |
| 2.11 su-Ra                        |      |      |          |       |           |       |
|                                   | N1   | -H1N | 1.555    | 1.555 |           |       |
| <a href="#">PLAT735 ALERT 1 C</a> | D-H  | Calc | 0.86(4), | Rep   | 0.859(19) | ..... |
| 2.11 su-Ra                        |      |      |          |       |           |       |
|                                   | N1   | -H1N | 1.555    | 1.555 |           |       |
| <a href="#">PLAT735 ALERT 1 C</a> | D-H  | Calc | 0.86(4), | Rep   | 0.853(19) | ..... |
| 2.11 su-Ra                        |      |      |          |       |           |       |
|                                   | N1   | -H2N | 1.555    | 1.555 |           |       |
| <a href="#">PLAT735 ALERT 1 C</a> | D-H  | Calc | 0.85(4), | Rep   | 0.849(19) | ..... |
| 2.11 su-Ra                        |      |      |          |       |           |       |
|                                   | N2   | -H4N | 1.555    | 1.555 |           |       |

### Alert level G

ABSMU\_01 Radiation type not identified. Calculation of  
 \_exptl\_absorpt\_correction\_mu not performed.

[PLAT860 ALERT 3 G](#) Note: Number of Least-Squares Restraints .....  
 4

[PLAT092 ALERT 4 G](#) Check: Wavelength given is not Cu,Mo or Ag Ka ..  
 0.69 Ang.

[PLAT128 ALERT 4 G](#) Non-standard setting of Space-group P21/c ....  
 P21/n

- 0 **ALERT level A** = In general: serious problem
- 0 **ALERT level B** = Potentially serious problem
- 9 **ALERT level C** = Check and explain
- 3 **ALERT level G** = General alerts; check

8 ALERT type 1 CIF construction/syntax error, inconsistent or missing data

0 ALERT type 2 Indicator that the structure model may be wrong or deficient

1 ALERT type 3 Indicator that the structure quality may be low

3 ALERT type 4 Improvement, methodology, query or suggestion

0 ALERT type 5 Informative message, check

## checkCIF publication errors

### Alert level A

[PUBL006 ALERT 1 A](#) \_publ\_requested\_journal is missing  
 e.g. 'Acta Crystallographica Section C'

[PUBL008 ALERT 1 A](#) \_publ\_section\_title is missing. Title of paper.

[PUBL010 ALERT 1 A](#) \_publ\_author\_address is missing. Author(s)  
 address(es).

[PUBL012 ALERT 1 A](#) \_publ\_section\_abstract is missing.  
 Abstract of paper in English.

---

## ●Alert level G

[PUBL013 ALERT 1 G](#) The `_publ_section_comment` (discussion of study) is missing. This is required for a full paper submission (but is optional for an electronic paper).

[PUBL017 ALERT 1 G](#) The `_publ_section_references` section is missing or empty.

---

4 **ALERT level A** = Data missing that is essential or data in wrong format

2 **ALERT level G** = General alerts. Data that may be required is missing
